# Supplementary material for: The Potential of Personalized Virtual Reality in Palliative Care: A Feasibility Trial
Source: PubMed Central journal article supplement (PMC8641032; doi:10.1177/1049909121994299), 2021-02-15
Supplement: sj-pdf-1-ajh-10.1177_1049909121994299.pdf [file sj-pdf-1-ajh-10.1177_1049909121994299.pdf]

**Supplementary File 1 VR content in the arms**

| <b>Control</b>         | <b>Intervention</b>           |
|------------------------|-------------------------------|
| Swimming with dolphins | African safari                |
| Hot air balloon ride   | Angel falls                   |
| New York               | Ayers Rock/Ululu              |
| Northern Lights        | Disney                        |
| Sunrise                | Swimming with dolphins        |
| Venice                 | Egypt                         |
|                        | Elephant & hippos from a boat |
|                        | Encounters with wild animals  |
|                        | Flying a plane                |
|                        | Hang-gliding                  |
|                        | India                         |
|                        | Maldives                      |
|                        | New York                      |
|                        | New Zealand                   |
|                        | Northern lights               |
|                        | Opera                         |
|                        | Paris                         |
|                        | Rome                          |
|                        | Sky diving                    |
|                        | Sunrise                       |
|                        | Venice                        |
|                        | Music festival                |
